# Supplementary material
Source: MDPI journal article supplement (https://www.mdpi.com/2073-4352/14/1/47)
Supplement: s1 [file s1 › crystals-2770044-supplementary.pdf]

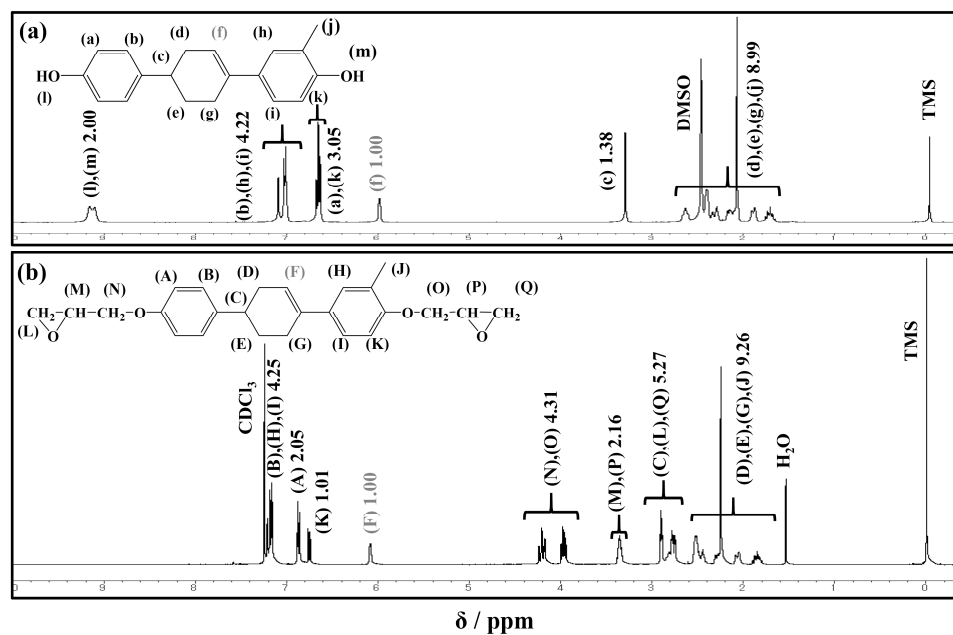

Figure S1.  $^1\text{H}$ -NMR spectra of the DGEDPC-Me (a) before and (b) after epoxidation.

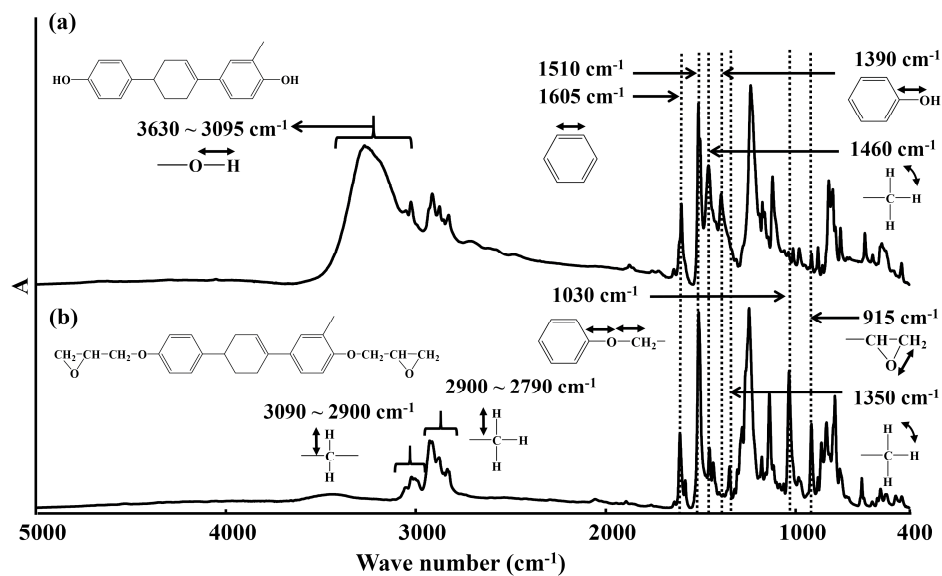

Figure S2. FT-IR spectra of the DGEDPC-Me (a) before and (b) after epoxidation.
